# Supplementary material for: The Role of Dexmedetomidine in Pediatric Patients Presenting with an Anticholinergic Toxidrome
Source: Hindawi journal article supplement (doi:10.1155/2021/7590960), 2021-08-28
Supplement: f1 [file 7590960.f1.pdf]

| Topic                    | Item No | Checklist item description                                                                             | Reported on Page Number/Line Number | Reported on Section/Paragraph |
|--------------------------|---------|--------------------------------------------------------------------------------------------------------|-------------------------------------|-------------------------------|
| Title                    | 1       | The diagnosis or intervention of primary focus followed by the words “case report”                     | P2/ Line 1                          |                               |
| Key Words                | 2       | 2 to 5 key words that identify diagnoses or interventions in this case report, including "case report" | P2/ Line 9                          |                               |
| Abstract (no references) | 3a      | Introduction: What is unique about this case and what does it add to the scientific literature?        | P2/ Lines 15-18                     |                               |
|                          | 3b      | Main symptoms and/or important clinical findings                                                       | P2/ Lines 22-24                     |                               |
|                          | 3c      | The main diagnoses, therapeutic interventions, and outcomes                                            | P2/ Lines 25-26                     |                               |
|                          | 3d      | Conclusion—What is the main “take-away” lesson(s) from this case?                                      | P3/ Lines 3-5                       |                               |
| Introduction             | 4       | One or two paragraphs summarizing why this case is unique ( <b>may include references</b> )            |                                     | Introduction P1               |
| Patient Information      | 5a      | De-identified patient specific information                                                             | P4/ L 11 & P5/ L 3                  |                               |
|                          | 5b      | Primary concerns and symptoms of the patient                                                           | P4/ L 12-15 & P5/ L4-6              |                               |
|                          | 5c      | Medical, family, and psycho-social history including relevant genetic information                      | N/A                                 |                               |
|                          | 5d      | Relevant past interventions with outcomes                                                              | P4/ L 15-16 & P5/ L8-9              |                               |
| Clinical Findings        | 6       | Describe significant physical examination (PE) and important clinical findings                         | P4/ L 14-18 & P5/ L10-11            |                               |
| Timeline                 | 7       | Historical and current information from this episode of care organized as a timeline                   |                                     | Case 1/P1; Case 2/P2          |
| Diagnostic Assessment    | 8a      | Diagnostic testing (such as PE, laboratory testing, imaging, surveys).                                 | P4/L 14-19 & P5 L 6-11              |                               |
|                          | 8b      | Diagnostic challenges (such as access to testing, financial, or cultural)                              | N/A                                 |                               |
|                          | 8c      | Diagnosis (including other diagnoses considered)                                                       | P4/ L 15 & P5 L 11                  |                               |
|                          | 8d      | Prognosis (such as staging in oncology) where applicable                                               | P4/ L 23-25 & P5/ L 15-17           |                               |
| Therapeutic Intervention | 9a      | Types of therapeutic intervention (such as pharmacologic, surgical, preventive, self-care)             | P4/L15,16,22. P5/L7,8,14            |                               |
|                          | 9b      | Administration of therapeutic intervention (such as dosage, strength, duration)                        | P4/ L 22 & P5/ L 14                 |                               |
|                          | 9c      | Changes in therapeutic intervention (with rationale)                                                   | P4/ L 20-22 & P5/ L 11-14           |                               |

|                        |     |                                                                                                        |                                         |                             |
|------------------------|-----|--------------------------------------------------------------------------------------------------------|-----------------------------------------|-----------------------------|
| Follow-up and Outcomes | 10a | Clinician and patient-assessed outcomes (if available)                                                 | P4/ L 23-24 & P5/ L 15-17               |                             |
|                        | 10b | Important follow-up diagnostic and other test results                                                  | P4/ L 23-25 & P5/ L 14-15               |                             |
|                        | 10c | Intervention adherence and tolerability (How was this assessed?)                                       | P4/ L 23-25 & P5/ L 15-17               |                             |
|                        | 10d | Adverse and unanticipated events                                                                       | None                                    |                             |
| Discussion             | 11a | A scientific discussion of the strengths AND limitations associated with this case report              |                                         | Conclusion P 1 & 2          |
|                        | 11b | Discussion of the relevant medical literature <b>with references</b>                                   |                                         | Discussions P 1-4           |
|                        | 11c | The scientific rationale for any conclusions (including assessment of possible causes)                 |                                         | Conclusion P 1              |
|                        | 11d | The primary “take-away” lessons of this case report (without references) in a one paragraph conclusion | P8/ L 15-23                             |                             |
| Patient Perspective    | 12  | The patient should share their perspective in one to two paragraphs on the treatment(s) they received  | N/A                                     |                             |
| Informed Consent       | 13  | Did the patient give informed consent? Please provide if requested                                     | Yes <input checked="" type="checkbox"/> | No <input type="checkbox"/> |

Please leave this space alone as it will be supplemented by the editorial office when needed.
